# Supplementary material
Source: Springer Nature journal article supplement (https://www.springermedizin.de/resource/supplementary/13063_2013_1848_MOESM1_ESM.pdf/9620350)
Supplement: MOESM1 [file 9620350]

## Enrolment

Assessed for eligibility

### Excluded

- ◆ Not meeting inclusion criteria
- ◆ Declined to participate
- ◆ Other reasons

## Randomisation

### Allocated to Acticoat™ dressing

- ◆ Dressing change every 3-4 days until healing or graft
- ◆ Pain and distress measures
- ◆ Visitrak tracing and 3D photograph

### Allocated to Acticoat™ and Mepitel™ dressing

- ◆ Dressing change every 3-4 days until healing or graft
- ◆ Pain and distress measures
- ◆ Visitrak tracing and 3D photograph

### Allocated to Mepilex Ag™ dressing

- ◆ Dressing change every 3-4 days until healing or graft
- ◆ Pain and distress measures
- ◆ Visitrak tracing and 3D photograph

- ◆ Ultrasound scan of burn area
- ◆ Patient and Observer Scar Assessment scale
- ◆ 3D photograph

### 3 month follow-Up

- ◆ Ultrasound scan of burn area
- ◆ Patient and Observer Scar Assessment scale
- ◆ 3D photograph

- ◆ Ultrasound scan of burn area
- ◆ Patient and Observer Scar Assessment scale
- ◆ 3D photograph

### 6 month follow-up

- ◆ Ultrasound scan of burn area
- ◆ Patient and Observer Scar Assessment scale
- ◆ 3D photograph

- ◆ Ultrasound scan of burn area
- ◆ Patient and Observer Scar Assessment scale
- ◆ 3D photograph

- ◆ Ultrasound scan of burn area
- ◆ Patient and Observer Scar Assessment scale
- ◆ 3D photograph
